# Supplementary material for: Temporal information loss in the macaque early visual system
Source: PubMed Central journal article supplement (PMC6977937; doi:10.1371/journal.pbio.3000570), 2020-01-23

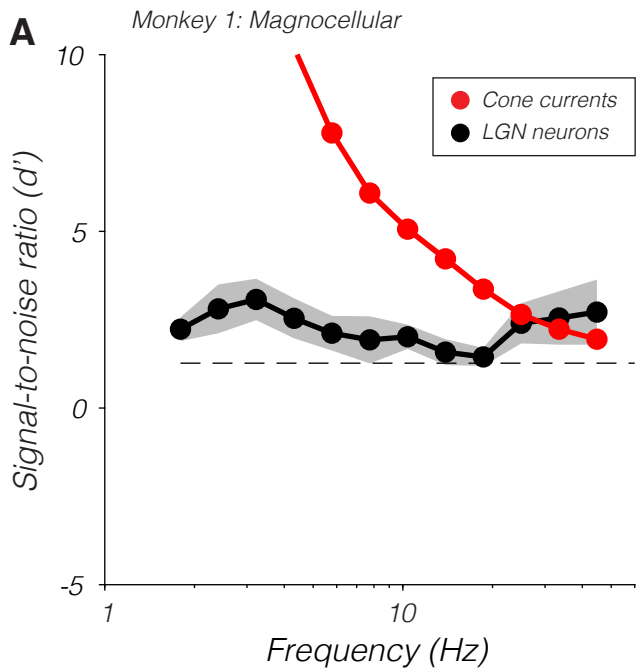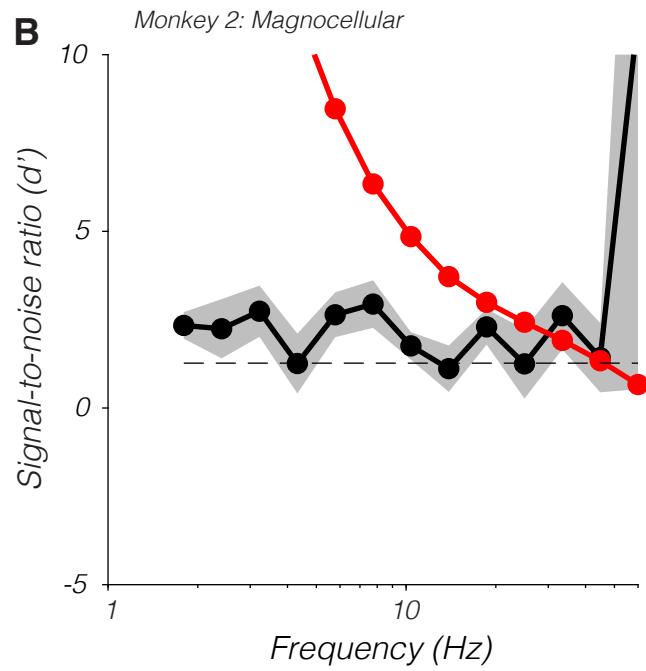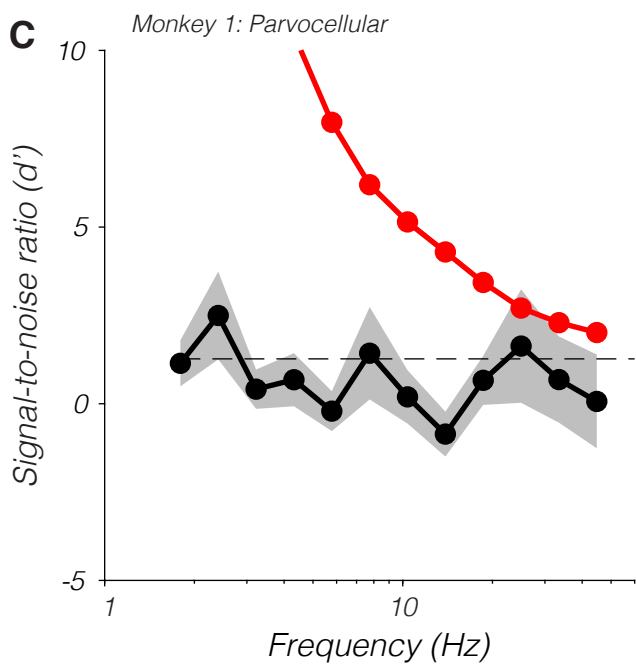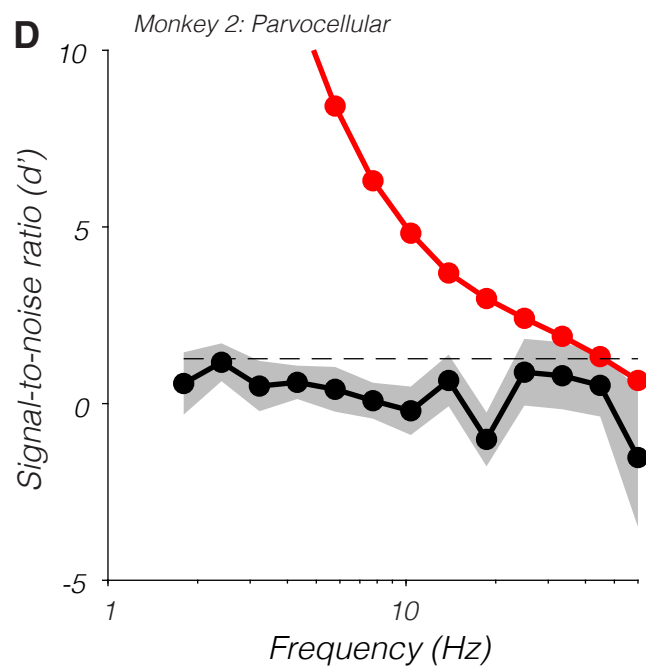

Supplement: pbio.3000570.s002.pdf [file pbio.3000570.s002.pdf]
