# Supplementary material for: Temporal information loss in the macaque early visual system
Source: PubMed Central journal article supplement (PMC6977937; doi:10.1371/journal.pbio.3000570), 2020-01-23
Supplement: pbio.3000570.s006.pdf [file pbio.3000570.s006.pdf]

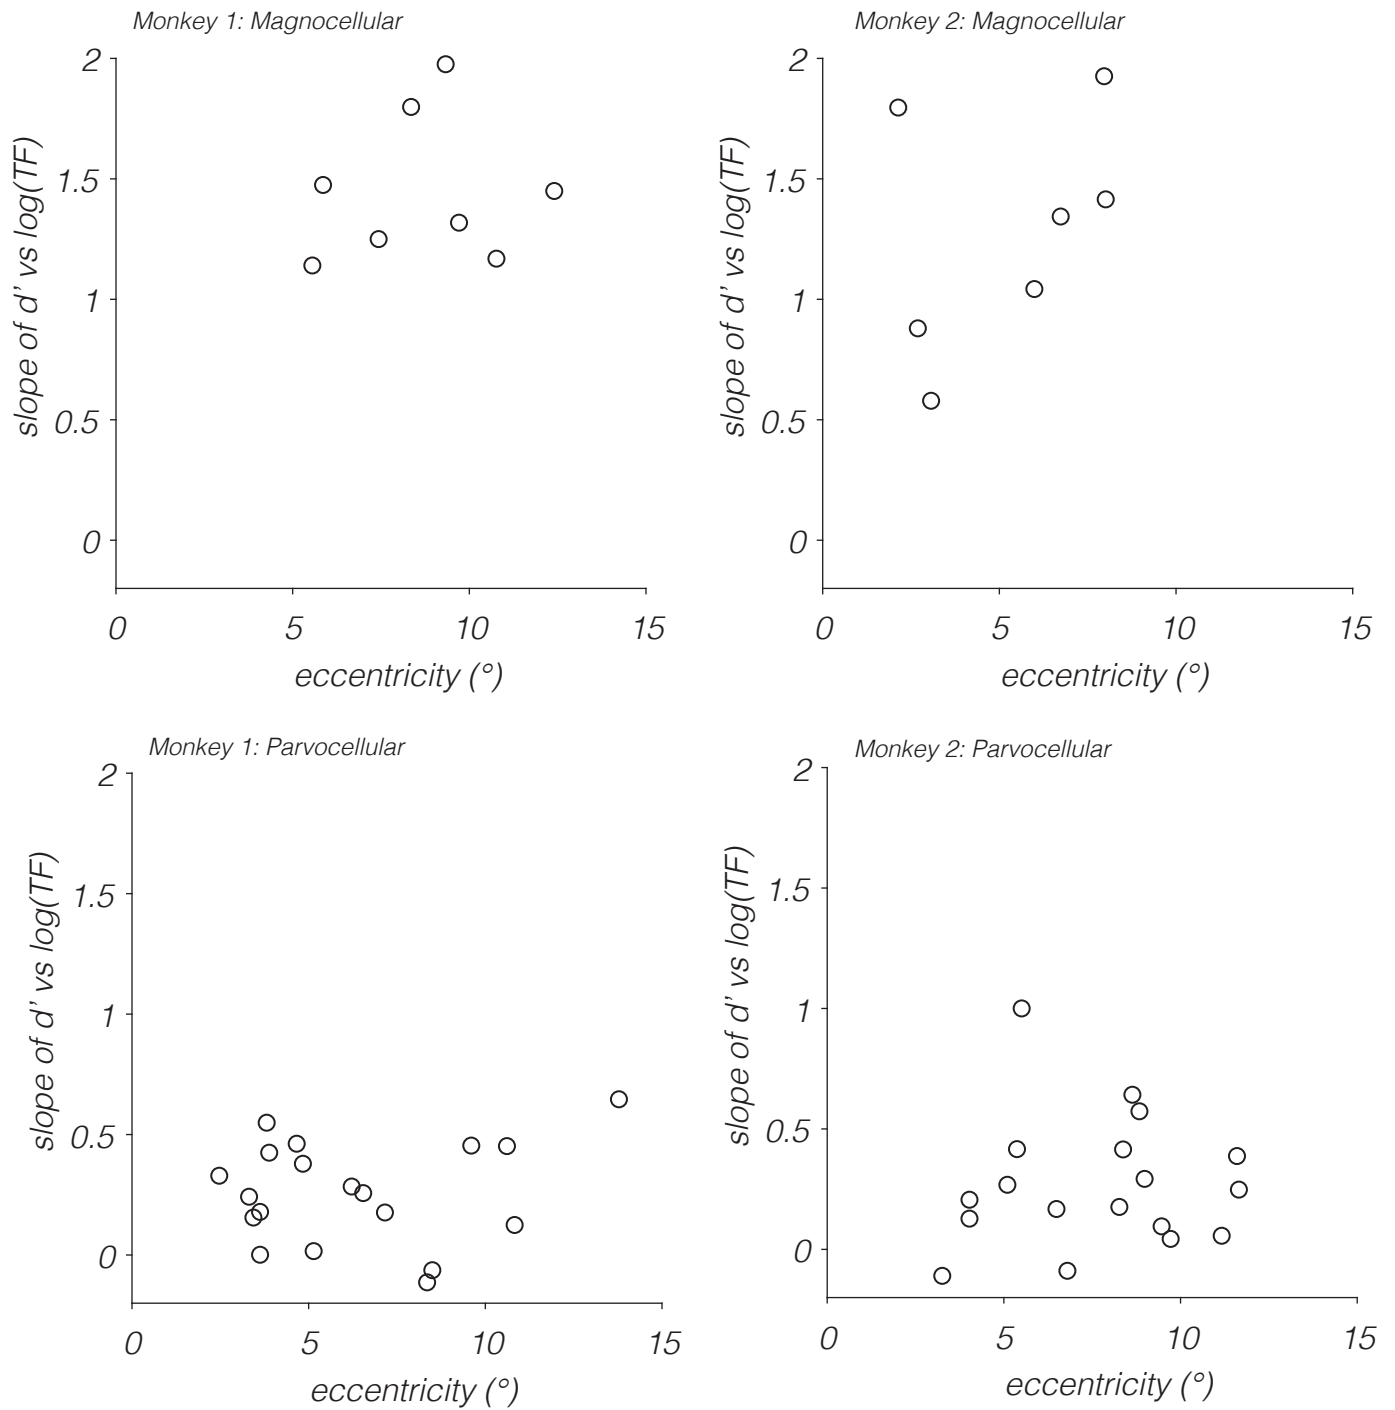

Reviewer Figure 1.  $d'$  of each LGN neuron was regressed on  $\log_{10}$  temporal frequency. The fitted slopes are plotted here as a function of RF eccentricity. A specialization for high-temporal frequencies at large eccentricities might manifest as an increase in slope with eccentricity. While there are hints of such a relationship in the magnocellular neurons from monkey 2 and parvocellular neurons from monkey 1, none of these relationships attained statistical significance.
